# Supplementary material for: A web-based lifestyle intervention program for Chinese college students: study protocol and baseline characteristics of a randomized placebo-controlled trial
Source: Springer Nature journal article supplement (doi:10.1186/s12889-019-7438-1), 2019-08-13
Supplement: MOESM1 [file 17063994]

**IG-1 & 2: weeks 1-4 for PA/FVC; weeks 5-8 for FVC/PA**

**Intervention Content**

| <b>Physical activity (PA)/ Fruit-vegetable consumption (FVC)</b> |                                                                               |                                                                                 |                                                                                                                                                                            | <b>Fruit-vegetable consumption (FVC)/ Physical activity (PA)</b> |                                                                               |                                                                                 |                                                                                                                                                                            |
|------------------------------------------------------------------|-------------------------------------------------------------------------------|---------------------------------------------------------------------------------|----------------------------------------------------------------------------------------------------------------------------------------------------------------------------|------------------------------------------------------------------|-------------------------------------------------------------------------------|---------------------------------------------------------------------------------|----------------------------------------------------------------------------------------------------------------------------------------------------------------------------|
| Week 1                                                           | Week 2                                                                        | Week 3                                                                          | Week 4                                                                                                                                                                     | Week 5                                                           | Week 6                                                                        | Week 7                                                                          | Week 8                                                                                                                                                                     |
| 1.Informing about the risk of inactive behavior/ unhealthy diet  | 1.Learning how to make specific action plans for PA/FVC                       | 1.Reviewing the execution of action plans; adjusting action plans               | 1.Reviewing the execution of coping plans; adjusting coping plans                                                                                                          | 1.Informing about the risk of unhealthy diet/ inactive behavior  | 1.Learning how to make specific action plans for FVC/PA                       | 1.Reviewing the execution of action plans; adjusting action plans               | 1.Reviewing the execution of coping plans; adjusting coping plans                                                                                                          |
| 2.Introducing and prompting the benefits of PA/FVC               | 2.Providing instruction on how, when and where to perform what type of PA/FVC | 2.Finding barriers or difficulties in plan execution; setting coping plans      | 2. Prompting perceived social support for PA/FVC from significant others. If no support, learn how to seek support (e.g., discuss with roommates or friends about support) | 2.Introducing and prompting the benefits of FVC/PA               | 2.Providing instruction on how, when and where to perform what type of FVC/PA | 2.Finding barriers or difficulties with plan execution; setting coping plans    | 2. Prompting perceived social support for FVC/PA from significant others. If no support, learn how to seek support (e.g., discuss with roommates or friends about support) |
| 3.Setting goals for PA/FVC and general health                    | 3.Taking examples of successful cases about action plan execution             | 3.Taking examples of successful cases about health behavior adherence to PA/FVC | 3.Taking examples of successful cases about behavior relapse prevention for PA/FVC                                                                                         | 3.Setting goals for FVC/PA and general health                    | 3.Taking examples of successful cases about action plan execution             | 3.Taking examples of successful cases about health behavior adherence to FVC/PA | 3.Taking examples of successful cases about behavior relapse prevention for FVC/PA                                                                                         |
| 4.Encouraging students to build confidence in PA/FVC             | 4.Prompting review of health goals                                            | 4.Providing encouragement for performing PA/FVC                                 | 4.Providing encouragement for performing PA/FVC                                                                                                                            | 4.Encouraging students to build confidence in FVC/PA             | 4.Prompting review of health goals                                            | 4.Providing encouragement for performing FVC/PA                                 | 4.Providing encouragement for performing FVC/PA                                                                                                                            |
|                                                                  | 5.Providing encouragement for performing PA/FVC                               |                                                                                 |                                                                                                                                                                            |                                                                  | 5.Providing encouragement for performing FVC/PA                               |                                                                                 |                                                                                                                                                                            |

|  |  | <b>Physical activity (PA) + Fruit and vegetable consumption (FVC)</b> |                             |                                                                                                                                                                                             |                                                                                                                                                                        |                                                                                                                                                                                                                                                                                                                         |                                                                                                                                                                                                  |                                                                                                                                                                                                                               |                                                                                                                                                                                                                    |
|--|--|-----------------------------------------------------------------------|-----------------------------|---------------------------------------------------------------------------------------------------------------------------------------------------------------------------------------------|------------------------------------------------------------------------------------------------------------------------------------------------------------------------|-------------------------------------------------------------------------------------------------------------------------------------------------------------------------------------------------------------------------------------------------------------------------------------------------------------------------|--------------------------------------------------------------------------------------------------------------------------------------------------------------------------------------------------|-------------------------------------------------------------------------------------------------------------------------------------------------------------------------------------------------------------------------------|--------------------------------------------------------------------------------------------------------------------------------------------------------------------------------------------------------------------|
|  |  | Week 1                                                                | Week 2                      | Week 3                                                                                                                                                                                      | Week 4                                                                                                                                                                 | Week 5                                                                                                                                                                                                                                                                                                                  | Week 6                                                                                                                                                                                           | Week 7                                                                                                                                                                                                                        | Week 8                                                                                                                                                                                                             |
|  |  | <b>IG-3: 8-weeks for PA and FVC</b>                                   | <b>Intervention Content</b> | 1. Informing about the risk of inactive behavior and unhealthy diet<br>2. Introducing and prompting the benefits of PA and FVC<br>3. Encouraging students to build confidence in PA and FVC | 1. Setting goals for PA and FVC, as well as general health<br>2. Prompting feedback on PA/FVC performance<br>3. Encouraging students to build confidence in PA and FVC | 1. Learning how to make specific action plans for PA and FVC<br>2. Providing instruction on how, when and where to perform what type of PA and FVC<br>3. Taking examples of successful cases about action plan execution<br>4. Prompting review of health goals<br>5. Providing encouragement for performing PA and FVC | 1. Reviewing the execution of action plans; adjusting action plans<br>2. Taking examples of successful cases about action plan execution<br>3. Providing encouragement for performing PA and FVC | 1. Finding barriers or difficulties with plan execution; setting coping plans<br>2. Taking examples of successful cases about health behavior adherence to PA and FVC<br>3. Providing encouragement for performing PA and FVC | 1. Reviewing the execution of coping plans; adjusting coping plans<br>2. Taking examples of successful cases about health behavior adherence to PA and FVC<br>3. Providing encouragement for performing PA and FVC |

|                              |                           |                                                       |                                                       |                                           |                                                       |                                                                       |                                                                       |                                                           |                                                         |
|------------------------------|---------------------------|-------------------------------------------------------|-------------------------------------------------------|-------------------------------------------|-------------------------------------------------------|-----------------------------------------------------------------------|-----------------------------------------------------------------------|-----------------------------------------------------------|---------------------------------------------------------|
| <b>Placebo control group</b> | <b>Placebo Treatments</b> | Leisure tourism                                       |                                                       | Winter warmth                             |                                                       | Emotion regulation                                                    |                                                                       | Music & Movie                                             |                                                         |
|                              |                           | Introduction to five tourist attractions in Hong Kong | Introduction to five tourist attractions in Hong Kong | Five life tips for keeping warm in winter | Acupressure massage skills for keeping warm in winter | The use of three essential oils for relaxation and emotion adjustment | The use of three general psychological skills for regulating emotions | Introduction to three types of light music for relaxation | Introduction to three interesting movies for relaxation |
